# Supplementary material
Source: publisher figshare collection journal article supplement (https://karger.figshare.com/ndownloader/files/23741804)
Supplement: Supplementary file 1 [file 23741804]

| **Supplementary** **Table 1.** **Comparison at the baseline visit (1999-2003) of included participants vs. those excluded from analysis** | | | |
| --- | --- | --- | --- |
|  | **Included**  **(n=835)** | **Excluded**  **(n=1213)** | **P value** |
| Age (years), mean (SD) | 55.8 ± 10.5 | 59.4 ± 12.4 | < 0.001 |
| Female sex, % | 61.1 | 62.3 | 0.57 |
| Body mass index (kg/m2), mean (SD) | 27.2 ± 4.6 | 27.9 ± 5.2 | 0.13 |
| Diabetes mellitus, % | 4.4 | 9.0 | < 0.001 |
| Dyslipidemia, % | 41.1 | 49.4 | < 0.001 |
| Hypertension, % | 45.7 | 58.1 | < 0.001 |
| Current smoker, % | 18.9 | 21.2 | 0.20 |

Supplementary Table 1. Comparison at the baseline visit (1999-2003) of included participants vs. those excluded from analysis. Among 2048 participants with 45 years or more in visit between October 2006 and July 2008, 134 (6.5%) had died, 198 (9.7%) refused re-evaluation and 580 (28.3%) were lost to follow-up. We further excluded 301 patients with previous myocardial infarction, percutaneous or surgical revascularization, prior cardiac surgery, significant (moderate to severe) valvular heart disease, history of thyroid disease, treatment with drugs that interfere with thyroid function; without serum available for determination of thyroid function; or with TSH, free thyroxine (FT4) or free triiodothyronine (FT3) outside of the reference range. SD: standard deviation.
